# Supplementary material for: Ginsenosides Rb2 and Rd2 isolated from Panax notoginseng flowers attenuate platelet function through P2Y12-mediated cAMP/PKA and PI3K/Akt/Erk1/2 signaling
Source: Royal Society of Chemistry journal article supplement (doi:10.1039/d1fo00531f), 2021-01-01
Supplement: d1fo00531f1.pdf [file d1fo00531f1.pdf]

## Supporting Information

**Table S1. Information of the main chemicals used.**

| Chemical names                             | Source                             | Catalog No.<br>(CAT#) |
|--------------------------------------------|------------------------------------|-----------------------|
| Collagen                                   | Chrono-Log Corp.                   | 385                   |
| ADP                                        | Sigma Aldrich                      | A2754                 |
| thrombin                                   | Sigma Aldrich                      | T7009                 |
| PAF                                        | Sigma Aldrich                      | 511075                |
| SQ22536                                    | Sigma Aldrich                      | HY-100396             |
| TRAP (AYPGKF-NH <sub>2</sub> )             | Peptides International             | PAR-3674-PI           |
| cAMP ELISA kit                             | Cayman Chemicals                   | 58100                 |
| FITC-conjugated CD62P antibody             | eBiosciences                       | MA5-16428             |
| FITC-conjugated CD63 antibody              | eBiosciences                       | MA1-19602             |
| FITC-conjugated CD40L antibody             | eBiosciences                       | 11-1548-42            |
| FITC-conjugated PAC-1                      | eBiosciences                       | MA5-28564             |
| Alexa Fluor™ 488-conjugated<br>fibrinogen  | Thermo Fisher Scientific           | F13191                |
| p-VASP <sup>Ser157</sup> antibody          | Cell Signaling Technology          | 84519                 |
| β-actin antibody                           | Cell Signaling Technology          | 3700                  |
| GAPDH antibody                             | Cell Signaling Technology          | 5174                  |
| p-PKA substrate antibody                   | Cell Signaling Technology          | 9624                  |
| p-Erk1/2 <sup>Thr202/Tyr204</sup> antibody | Cell Signaling Technology          | 4370                  |
| p-Akt <sup>Ser473</sup> antibody           | Cell Signaling Technology          | 4060                  |
| p-integrin β3 <sup>Tyr773</sup> antibody   | ImmunoWay Biotechnology<br>Company | YP0144                |
| Cangrelor                                  | Selleck Chemical                   | S3737                 |
| 740 Y-P                                    | Selleck Chemical                   | S7865                 |
| CytoPainter Phalloidin-ifluor 488          | Abcam                              | ab176753              |
| H89                                        | Abcam                              | ab143787              |
| LDH detection kit <sup>PLUS</sup>          | Roche Applied Science              | 04744926001           |

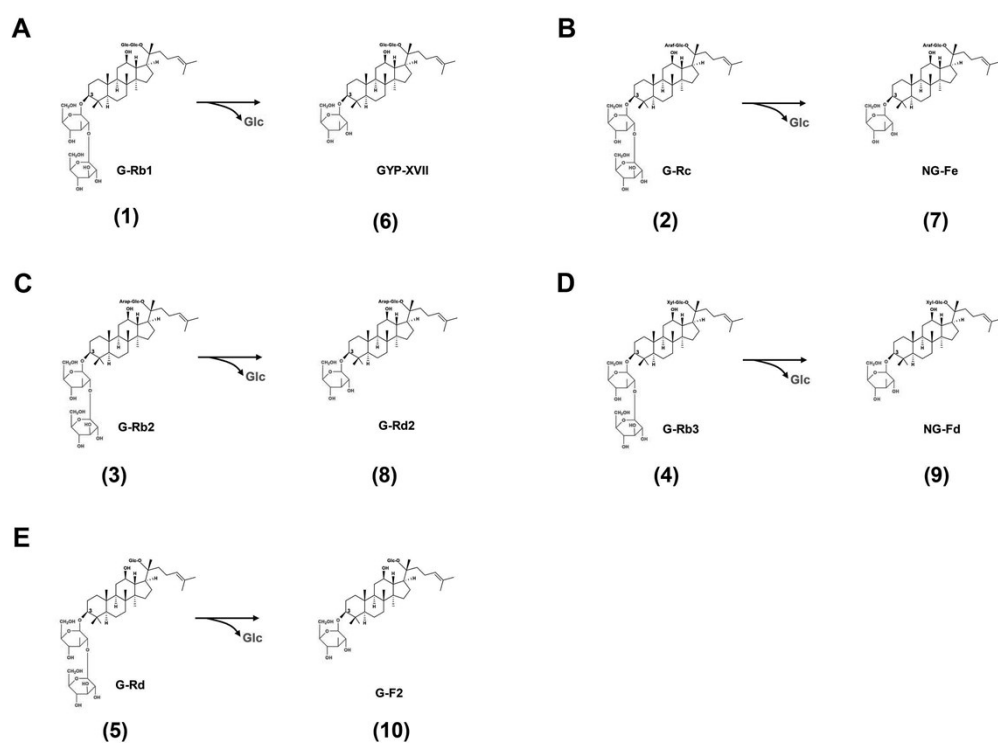

**Figure S1. Chemical structures of 10 saponins in *Panax notoginseng* flowers (PNF).** The major saponins of PNF (left), compounds **(1)-(5)**, can be transformed to minor saponins of PNF (right), compounds **(6)-(10)**, respectively, by selectively cleaving the  $\beta$ -(1 $\rightarrow$ 2)-glucosidic linkage at position C-3 of ginsenosides, when PNF is extracted by water. G, Ginsenoside; GYP, Gypenoside; NG, Notoginsenoside; Glc,  $\beta$ -D-glucose.

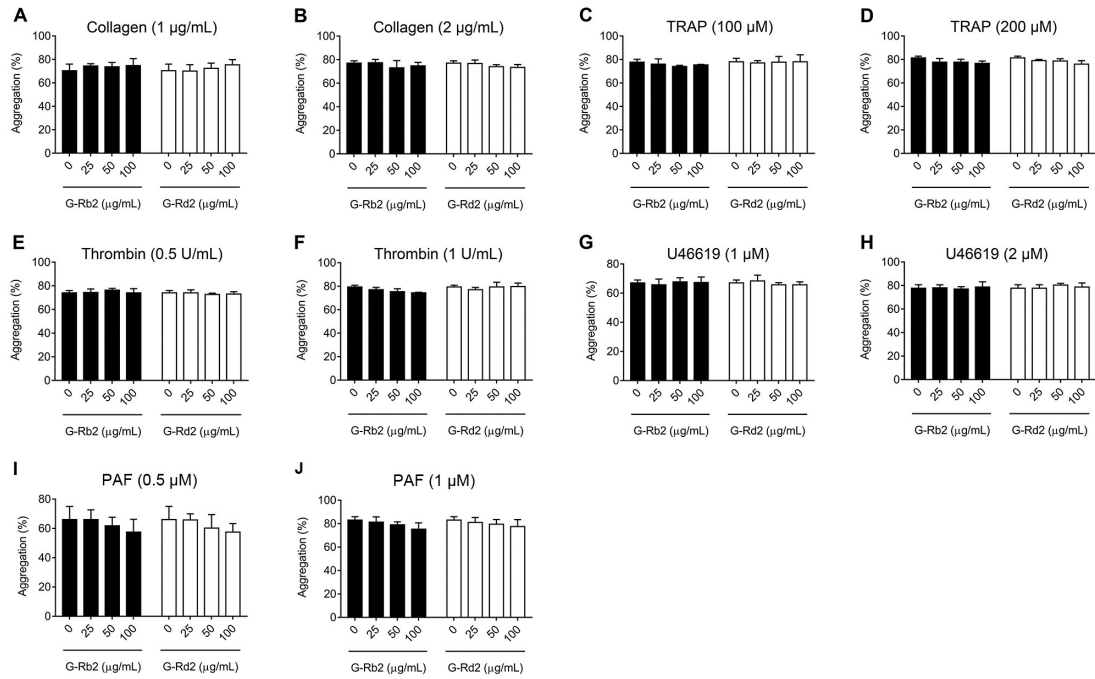

**Figure S2. G-Rb2 and G-Rd2 do not affect platelet aggregation in response to collagen, TRAP, thrombin, U46619, or PAF in human platelets *in vitro*.** Human PRP were pre-incubated with various concentrations (25, 50, or 100 µg/mL) of G-Rb2 or G-Rd2 or the vehicle control for 40 min. Platelet aggregation was stimulated by 1 µg/mL collagen (A), 2 µg/mL collagen (B), 100 µM thrombin receptor activating peptide (TRAP) (C), 200 µM TRAP (D), 0.5 U/mL thrombin (E), 1 U/mL thrombin (F), 1 µM U46619 (G), or 2 µM U46619 (H), 0.5 µM PAF (I), or 1 µM PAF (J). Data was presented as mean  $\pm$  SD (n=6). Statistical significance was analyzed by a one-way ANOVA followed by Dunnett's *t*-test. No significant differences were observed between the vehicle control and G-Rb2 or G-Rd2.

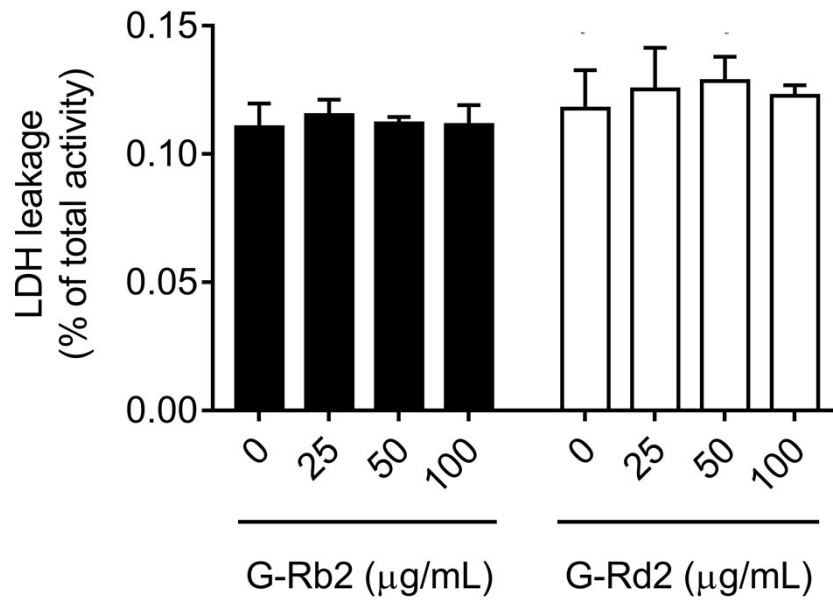

**Figure S3. G-Rb2 and G-Rd2 do not exert cytotoxic effect on human platelets *in vitro*.** Human PRP were pre-incubated with various concentrations (25, 50, or 100 µg/mL) of G-Rb2 or G-Rd2 or the vehicle control for 40 min. The leakage of lactate dehydrogenase (LDH) from platelets was measured to evaluate the cytotoxic effect of G-Rb2 and G-Rd2. The extent of LDH leakage was expressed as % of total enzyme activity measured in platelets completely lysed with 10% sodium dodecyl sulphate (SDS; positive control). Data was presented as mean  $\pm$  SD (n=5). Statistical significance was analyzed by a one-way ANOVA followed by Dunnett's *t*-test. No significant differences were observed between the vehicle control and G-Rb2 or G-Rd2.
